# Lung endothelium instructs dormancy of susceptible metastatic tumour cells

Moritz Jakob\*<sup>#,1,2,3</sup>, Ki Hong Lee\*<sup>1,2,3</sup>, Alexey Uvarovskii<sup>4,6,§</sup>, Svetlana Ovchinnikova<sup>4,5</sup>, Shubhada R Kulkarni<sup>1,2</sup>, Till Rostalski<sup>1,2</sup>, Simon Anders<sup>4,5</sup>, and Hellmut G Augustin<sup>#,1,2</sup>

<sup>1</sup>European Center for Angioscience (ECAS), Medical Faculty Mannheim, Heidelberg University; <sup>2</sup>Division of Vascular Oncology and Metastasis, German Cancer Research Center Heidelberg (DKFZ-ZMBH Alliance); <sup>3</sup>Faculty of Biosciences, Heidelberg University; <sup>4</sup>Center for Molecular Biology (ZMBH), Heidelberg University; <sup>5</sup>Bioquant Center, Heidelberg University

§present address: Evotec SE, Göttingen

\*Equally contributing first authors; #Corresponding authors

## Correspondence should be addressed to:

Moritz Jakob or Hellmut G. Augustin  
European Center for Angioscience, Medical Faculty Mannheim, Heidelberg University, and  
German Cancer Research Center Heidelberg  
Im Neuenheimer Feld 280  
D-69120 Heidelberg, Germany  
Phone: +49-6221-421500  
Email: m.jakab@dkfz.de or augustin@angioscience.de

## 1 **Abstract**

2 During metastasis, cancer cells hijack blood vessels and travel via the circulation to colonize  
3 distant sites<sup>1,2</sup>. Due to the rarity of these events, the immediate cell fate decisions of arrested  
4 circulating tumour cells (aCTC) are poorly understood and the role of the endothelium, as the  
5 interface of dissemination, remains elusive<sup>3,4</sup>. Here, we developed a novel strategy to  
6 specifically enrich for aCTC subpopulations capturing all cell states of the extravasation  
7 process and, in combination with single cell RNA-sequencing, provide a first blueprint of the  
8 transcriptional basis of early aCTC decisions. Upon their arrest at the metastatic site, tumour  
9 cells either started proliferating intravascularly or extravasated and preferably reached a state  
10 of quiescence. Endothelial-derived angiocrine Wnt factors were found to drive this bifurcation  
11 by inducing a mesenchymal-like phenotype in aCTCs instructing them to follow the  
12 extravasation-dormancy branch. Surprisingly, homogenous tumour cell pools showed an  
13 unexpected baseline heterogeneity in Wnt signalling activity and epithelial-to-mesenchyme-  
14 transition (EMT) states. This heterogeneity was established at the epigenetic level and served  
15 as the driving force of aCTC behaviour. Hypomethylation enabled high baseline Wnt and EMT  
16 activity in tumour cells leading them to preferably follow the extravasation-dormancy route,  
17 whereas methylated tumour cells had low activity and proliferated intravascularly. The data  
18 identify the pre-determined methylation status of disseminated tumour cells as a key regulator  
19 of aCTC behaviour in the metastatic niche. While metastatic niche-derived factors per default  
20 instruct the acquisition of quiescence, aCTCs unwind a default proliferation program and only  
21 deviate from it if hypomethylation in key gene families renders them responsive towards the  
22 microenvironment.

## 23 **Main:**

24 Tumour cell (TC) dormancy poses a major hurdle for the treatment of cancer<sup>1-3</sup>. During  
25 metastasis, dormant tumour cells (DTC) reside in close proximity to blood vessels and acquire  
26 a stem-like phenotype<sup>4</sup>. Yet, metastasizing TCs show a remarkable heterogeneity in their  
27 genetic and molecular makeup, which can be attributed to why certain cancer cells reach a state  
28 of tumour dormancy, whereas others outgrow immediately to form macro-metastases<sup>5-8</sup>. This  
29 differential behaviour is not solely driven by TC intrinsic properties, but also influenced by the  
30 niche, as certain niches in principle favour TC proliferation, whereas others are primarily  
31 tumour-suppressive<sup>9-11</sup>. This argues for a scenario in which the induction of dormancy depends  
32 on cell-intrinsic properties and matching microenvironmental factors. This is also corroborated  
33 by the finding that DTCs, once committed to their fate, require dramatic events to be  
34 awakened<sup>12,13</sup>. We therefore hypothesized that TC behaviour is primed during the initial arrival  
35 of CTCs at the metastatic niche and that the vascular endothelium, as the interface of  
36 dissemination, is a crucial fate instructor.

## 37 **Wnt and EMT pathways are drivers of tumour extravasation and dormancy**

38 To test our hypothesis, we developed a novel experimental model to temporally assess TC and  
39 endothelial cell (EC) interactions *in vivo* at single cell resolution for the first time. Wildtype  
40 Balb/c mice were intravenously injected with GFP-expressing 4T1 breast cancer cells (4T1-  
41 GFP). Lung-seeded TCs and corresponding total lung ECs were isolated at day 0 (baseline),  
42 day 1.5 (peak phase of extravasation) and day 3.5 (induction of proliferation) and purified by

43 fluorescence-activated cell sorting (FACS) (**Fig. 1a**). Plate-based single cell RNA-sequencing  
44 (scRNAseq) was used to analyse the transcriptional signatures of TC-EC interactions during  
45 metastatic colonization. To discriminate extravascular from intravascular TCs, mice were  
46 intravenously injected at day 1.5 with fluorescently labelled anti-H2-Kd antibody labelling all  
47 body cells, including syngeneic 4T1-GFP cells that were exposed to the circulation. We further  
48 discriminated proliferative from quiescent TCs at day 3.5 based on the dilution of CellTracer  
49 dye and considered TCs exhibiting dye retention as dormant (**Fig. 1a**). For each TC  
50 subpopulation and matched ECs, equal numbers were sorted from at least three biological  
51 replicates. The cells in the dataset showed homogenous distribution for counts and detected  
52 genes and the replicates interlaced well in a Uniform Manifold Approximation and Projection  
53 (UMAP), demonstrating the robustness of the experimental approach. Moreover, substructures  
54 in the UMAP were found to be specifically enriched for cells from the respective FACS gates,  
55 suggesting that the gating strategy was suitable to enrich rare TC subpopulations, even though  
56 it did not yield high purity. Correspondingly, *H2-K1* expression did not differ between the  
57 intravascular and extravascular fraction, highlighting that differences in staining intensity  
58 reflected exposure to circulation and not gene regulation.

59 Clustering of the combined TC dataset identified a total of five clusters that reflected the  
60 respective FACS gates (**Fig. 1b**). Trajectory analysis to reconstruct the colonization process  
61 with TCs of the intravascular cluster set as starting point identified three main trajectories  
62 transitioning 1) from intravascular to proliferative cells, 2) to a subset of extravascular cells,  
63 and 3) through a subset of extravascular cells to dormant cells (**Fig. 1c**). These findings  
64 indicated that TC extravasation was a pre-requisite for tumour dormancy, but dispensable for  
65 TC proliferation, which molecularly defines earlier microscopy-based concepts<sup>14,15</sup>. Based on  
66 this finding, we next compared proliferative vs. dormant cells and scored each TC from the day  
67 3.5 dataset for the expression of G2M-phase and S-phase genes. Only TCs that showed dye  
68 retention and were not in cycle were considered as bona fide dormant to exclude cells that had  
69 proliferated but dropped out of cycle (**Fig. 1d**). After regression of cell cycle-associated genes,  
70 differential gene expression analysis (DGEA) was performed with subsequent gene set  
71 enrichment analysis (GSEA) (**Fig. 1e**). In line with previous reports<sup>16,17</sup>, transforming growth  
72 factor beta (TGF $\beta$ ) signalling and epithelial-to-mesenchyme transition (EMT) gene sets were  
73 enriched in DTCs. Surprisingly, beta-Catenin-mediated canonical Wnt signalling was identified  
74 as one of the most significantly enriched pathways (**Fig. 1e**). Wnt ligands have extensively been  
75 characterized as protumorigenic growth factors<sup>18</sup>, promoting proliferation in primary tumours  
76 and metastases, as well as CTC survival<sup>19-22</sup>. Unexpectedly, expression of Wnt pathway and  
77 EMT-associated genes was enriched alongside the extravascular-dormancy trajectory (**Fig. 1f,**  
78 **g**), supporting the hypothesis that niche-derived Wnt ligands may drive tumour dormancy. In  
79 conclusion, these data provide a first transcriptional blueprint of aCTC fate decisions in the  
80 metastatic lung.

### 81 **The lung endothelium displays a bimodal response towards arriving CTCs**

82 It was previously established that the endothelium serves as a systemic amplifier of primary  
83 tumour-derived signals<sup>23,24</sup>. Here, clustering of lung ECs revealed the emergence of cycling  
84 ECs as well as a shift of general capillary ECs (gCap)<sup>25,26</sup> towards an activated phenotype as a  
85 response towards arriving TCs. To determine the basis of gCap activation, DGEA on filtered

86 capillary EC pseudo-bulks was performed. For this, large vessel EC were manually annotated  
87 and removed from the dataset based on congruent marker gene expression. Capillary ECs  
88 displayed an immediate response pattern with genes being mostly regulated at day 1.5. These  
89 immediate-response genes involved immune modulatory and cell cycle genes and were  
90 regulated in a bimodal-manner with systemic upregulation of secreted EC factors (angiokines)  
91 and focal enrichment of biosynthesis genes in activated gCap. This led us to conclude that the  
92 lung endothelium, while exerting important immune regulatory functions at the systems level,  
93 also served as a local producer of biomass thereby generating a conducive micro-niche.

#### 94 **Niche-derived angiocrine Wnt ligands are instructors of tumour dormancy**

95 Next, we analysed the consequences of the enriched Wnt signalling in DTCs. For this purpose,  
96 4T1-GFP breast cancer cells were treated *in vitro* for 2 weeks with canonical Wnt pathway  
97 agonists prior to injection in a gain-of-function (G-O-F) approach. Conversely, mice were  
98 treated with a Porcupine inhibitor (LGK974) to create a Wnt-deficient environment (**Fig. 2a**).  
99 As expected, Wnt G-O-F programmed TCs to follow the extravasation-dormancy route, which  
100 resulted in enhanced extravasation and higher incidence of dormancy with overall reduced  
101 short-term metastatic burden (**Fig 2b, c**). In contrast, Wnt depletion enhanced metastatic  
102 outgrowth, but did not affect extravasation (**Fig 2b, c**). As modulating Wnt signalling was  
103 sufficient to alter TC behaviour *in vivo*, we probed for sources of Wnt ligands in the metastatic  
104 niche. The endothelium was found to robustly express Wnt ligands across the experimental  
105 timeline. Yet, their expression was not changed (**Fig. 2d**). Nevertheless, depleting Wnt ligands  
106 specifically from the vascular niche by EC-specific knockout of the Wnt cargo receptor *Wntless*  
107 (*Wls*) led to a significantly increased short-term metastatic burden, thereby phenocopying the  
108 systemic pharmacological inhibition. This was observed for E0771-GFP breast cancer cells, but  
109 also for B16F10 melanoma cells (**Fig. 2e**), highlighting the endothelium as a major source of  
110 dormancy-inducing Wnt ligands. The Wnt dependency of metastatic dormancy acquisition  
111 could also be observed in a clinically relevant spontaneous metastasis model involving surgical  
112 removal of the primary tumour (**Fig. 2f**). Specifically, systemic treatment with LGK974 did not  
113 affect primary tumour growth or size, mouse body weight or the tumour vasculature (**Fig. 2g**),  
114 but resulted in a significantly increased metastatic burden (**Fig. 2h**). Collectively, these data  
115 establish that angiocrine Wnt ligands are crucial instructors of extravasated TC dormancy.

#### 116 **Metastatic tumour cell behaviour is not regulated at the receptor-ligand level or by niche** 117 **occupancy**

118 As the expression of angiocrine Wnt ligands was not changed, we reasoned that Wnt signalling  
119 activity differences may result from distinct TC receptor repertoires. Surprisingly, prediction  
120 of EC-TC interactions based on DGEA of TC pseudo-bulks (intravascular vs extravascular and  
121 proliferative vs. dormant) using CellPhoneDB<sup>26</sup> did not reveal Wnt pathway components.  
122 Repeating the analysis specifically with TC-expressed Wnt receptors led to the identification  
123 of five (co)-receptors that were differentially expressed for either the intravascular vs  
124 extravascular or the dormant vs proliferative comparison, but not for both. Moreover, receptor  
125 expression was not enriched in the intravascular-proliferative or the extravasation-dormancy  
126 branch of the trajectory-analysis, suggesting that the observed differences in Wnt signalling  
127 activity were not established at the receptor-ligand level.

128 As the lung endothelium harbours two distinct vascular beds that are defined by less penetrable  
129 gCaps and more permissive aerocytes (aCap)<sup>23,24</sup> (**Fig. 3a**), we tested whether distinct vascular  
130 niche occupancy could drive the observed differential TC behaviour. Employing an *in vivo*  
131 niche-labelling system<sup>28</sup>, we specifically enriched for ECs interacting with mostly proliferative  
132 4T1-GFP cells or quiescent D2.0R-GFP breast cancer cells that served as a proxy for dormant  
133 4T1 cells. Labelled niche ECs, as well as matched unlabelled total ECs were FACS-purified  
134 and subjected to bulk RNAseq (**Fig. 3b, c**). Aerocyte and gCap-specific genes that showed  
135 robust and stable expression were used to deconvolute the cellular composition of the bulk  
136 samples (**Fig. 3d**). While a general bias towards the aCap signature could be observed for all  
137 tumour-bearing samples, no differences were detected between the dormant and proliferative  
138 niche or their unlabelled counterparts (**Fig. 3e**), indicating that DTCs and proliferative TCs  
139 occupy the same vascular niches.

140 Interestingly, proliferative TCs, in contrast to DTCs, induced the production of extracellular  
141 matrix (ECM), immune response genes and proliferation in ECs. While matrix-remodelling  
142 processes were specific to the niche, proliferative and pro-inflammatory programs were part of  
143 a systemic response. We sought to deduce a marker gene set from the bulk comparisons that  
144 was specific for ECs extracted from the proliferative niche and tested all conditions against  
145 each other. The resulting gene panel was used to predict tumour-interacting ECs in the  
146 scRNAseq data. Predicted tumour-interacting ECs co-localized with the previously identified  
147 biosynthetic ECs in the UMAP, confirming the hypothesis that the endothelium elicited a  
148 bimodal response. To test the generality of the gene panel, a publicly available scRNAseq  
149 dataset<sup>29</sup> was utilized and a similar enrichment was found specifically for primary lung tumour  
150 ECs compared to non-tumorous matched samples.

### 151 **Heterogenous methylation states pre-determine tumour cell behaviour**

152 As DTC fates were established independently of differential exogenous factors, we next probed  
153 for TC-intrinsic properties. Surprisingly, cultured TCs exhibited a heterogeneous but  
154 correlating baseline expression of EMT- and Wnt pathway-associated genes (**Fig. 4a, b**). Such  
155 state differences were also identified in freshly isolated CTC of breast cancer patients<sup>30,31</sup>,  
156 indicating baseline tumour cell-intrinsic differences. Interestingly, overnight pulse treatment  
157 with Wnt agonists failed to programme the extravasation-dormancy shift observed for long-  
158 term treatments (**Fig. 4c**) and the expression profile of key EMT-associated transcription  
159 factors was not markedly changed between pulse-treated and reprogrammed cells. This led us  
160 to hypothesize that TC were restricted in their responsiveness towards niche-derived factors by  
161 an epigenetic barrier. In agreement, pulse-treatment of 4T1-GFP with de-methylating agent  
162 (decitabine) enabled TCs to preferably follow the extravasation-dormancy route (**Fig. 4d**). This  
163 was not driven by cellular fitness or changes in homing capacity. Similar to the Wnt G-O-F,  
164 hypomethylation did not induce EMT *in vitro* and dormancy-induction was still dependent on  
165 Wnt (**Fig. 4e**). Notably, pulse-treating hypomethylated cells with Wnt agonist prior to injection  
166 did not alter the *in vivo* phenotype, indicating that niche-derived signalling was saturated and  
167 sufficient. Moreover, none of the *in vitro* treatments affected the proliferation rate of  
168 proliferation-committed TCs *in vivo*, clearly showing that differences in short-term metastatic  
169 burden were a consequence of dormancy-induction.



170 We then assessed the methylation state of dormant and proliferative TCs by whole genome  
171 bisulfite-sequencing. Global methylation levels were not changed in DTCs, but promoter  
172 sequences and gene bodies displayed considerable hypomethylation, while enhancer sequences  
173 were unaffected (**Fig. 4f**). Remarkably, hypomethylation mainly occurred in genes and  
174 promoters that were epigenetically sealed in proliferative TCs (>70% methylation). We  
175 computed the overlap of genes with >10% hypomethylation in DTC and gene ontology terms  
176 from the mouse signature database (MSigDB)<sup>32</sup> and found transcription factor binding and cell  
177 fate processes as top hits. This confirmed the hypothesis that hypomethylation underlay cellular  
178 plasticity and was the driving force of TC responsiveness towards niche-derived dormancy-  
179 inducing factors.

## 180 **Discussion:**

181 Tumour cell pre-determination is an emerging concept<sup>33-35</sup>. Here, we identified the epigenetic  
182 pre-coding of disseminated TC behaviour in the metastatic niche. DTC were characterized by  
183 hypomethylation in promoter sequences and gene bodies, whereas proliferative TCs were  
184 epigenetically sealed. We envision that the plastic-dormant and the sealed-proliferative state  
185 form a dynamic equilibrium. Long-term treatment with a Wnt agonist would direct the  
186 equilibrium towards the plastic-dormant state, without affecting the cell-state itself. This is  
187 supported by reports of similar phenotype transitions caused by long-term *in vitro* treatments  
188 or targeted genetic manipulation of signalling pathways<sup>36,37</sup>. However, such state-transitions  
189 were also reported to occur spontaneously and were found to be a pre-requisite for metastatic  
190 outgrowth<sup>38</sup>. TC hypomethylation was reflected at the transcriptomic level by an elevated  
191 baseline expression of EMT and Wnt pathway-associated genes. A similar heterogeneous  
192 expression was found in freshly isolated CTCs from breast cancer patients and could be linked  
193 directly to their metastatic potential<sup>30,39</sup>. In this context, the primary tumour could be viewed as  
194 a heterogeneous amplifier in which high selective pressure forces the acquisition of distinct TC  
195 states. Recent lineage tracing experiments highlighted this phenomenon and revealed hybrid  
196 EMT TC states as the underlying principle of metastatic dissemination<sup>5-8,35</sup>. While EMT was  
197 needed for migration and intravasation, too much of it limited metastatic outgrowth.  
198 Interestingly, hybrid EMT states were not discrete but formed a continuum that correlated with  
199 the metastatic outcome<sup>6-8</sup>. Similar gradual states could be observed in cultured TCs and could  
200 be a direct consequence of epigenetic plasticity. Plastic cells would show high EMT and follow  
201 the extravasation-dormancy route, whereas sealed TCs would form macro-metastases. Probing  
202 the epigenetic and transcriptomic state of CTCs could therefore serve as predictive tool to assess  
203 the likelihood of metastatic relapse in patients.

204 Besides cell-intrinsic properties, disseminated TC phenotypes are established as a consequence  
205 of instructive niche-derived factors. Here, we identified endothelium-derived angiocrine Wnt  
206 signalling as a prototypic example of such dependency. However, other factors and other  
207 cellular sources have been identified previously and are most likely to act synergistically<sup>9, 16, 17,</sup>  
208 <sup>40-44</sup>. Most surprisingly, homeostatic angiocrine Wnt signalling was found to be sufficient to  
209 drive dormancy-induction, suggesting a default tumour-suppressive lung niche. Similar default  
210 programs could occur in other organs in which ECs comprise a major Wnt source and were  
211 reported previously in different contexts<sup>9,11</sup>. Moreover, primary tumour-instructed remodelling

212 of the niche could change the default state<sup>45-49</sup>. Additionally, the data strongly suggest that  
213 metastatic TCs actively inflicted a niche-EC gene program that resembled primary tumour EC  
214 signatures<sup>29,50</sup> and that could fuel TC proliferation by altering the biophysical properties of the  
215 micro-niche.

216 Collectively, these data provide a first insight into the establishment of arrested CTC fates. We  
217 show that susceptible epigenetic states render TCs responsive towards niche-derived default  
218 factors, thus, opening the opportunity to probe for TC-niche interdependencies at the systems  
219 level.

220

221 **References:**

- 222 1 Risson, E., Nobre, A. R., Maguer-Satta, V. & Aguirre-Ghiso, J. A. The current paradigm  
223 and challenges ahead for the dormancy of disseminated tumor cells. *Nat. Cancer* 1, 672-  
224 680, doi:10.1038/s43018-020-0088-5 (2020).
- 225 2 Polzer, B. & Klein, C. A. Metastasis awakening: the challenges of targeting minimal  
226 residual cancer. *Nat. Med.* 19, 274-275, doi:10.1038/nm.3121 (2013).
- 227 3 Labelle, M. & Hynes, R. O. The initial hours of metastasis: the importance of cooperative  
228 host–tumor cell interactions during hematogenous dissemination. *Cancer Discovery* 2,  
229 1091-1099, doi:10.1158/2159-8290.Cd-12-0329 (2012).
- 230 4 Ghajar, C. M. Metastasis prevention by targeting the dormant niche. *Nat. Rev. Cancer* 15,  
231 238-247, doi:10.1038/nrc3910 (2015).
- 232 5 Fluegen, G. et al. Phenotypic heterogeneity of disseminated tumour cells is preset by  
233 primary tumour hypoxic microenvironments. *Nat. Cell Biol.* 19, 120-132,  
234 doi:10.1038/ncb3465 (2017).
- 235 6 Simeonov, K. P. et al. Single-cell lineage tracing of metastatic cancer reveals selection of  
236 hybrid EMT states. *Cancer Cell* 39, 1150-1162.e1159, doi:10.1016/j.ccell.2021.05.005  
237 (2021).
- 238 7 Löönd, F. et al. Distinct contributions of partial and full EMT to breast cancer malignancy.  
239 *Dev. Cell* 56, 3203-3221.e3211, doi:10.1016/j.devcel.2021.11.006 (2021).
- 240 8 Yang, D. et al. Lineage tracing reveals the phylodynamics, plasticity, and paths of tumor  
241 evolution. *Cell*, doi:10.1016/j.cell.2022.04.015 (2022).
- 242 9 Ghajar, C. M. et al. The perivascular niche regulates breast tumour dormancy. *Nat. Cell*  
243 *Biol.* 15, 807-817, doi:10.1038/ncb2767 (2013).
- 244 10 Baumann, Z., Auf der Maur, P. & Bentires-Alj, M. Feed-forward loops between metastatic  
245 cancer cells and their microenvironment—the stage of escalation. *EMBO Mol. Med.*, e14283,  
246 doi:10.15252/emmm.202114283 (2022).
- 247 11 Crist, S. B. et al. Unchecked oxidative stress in skeletal muscle prevents outgrowth of  
248 disseminated tumour cells. *Nat. Cell Biol.* 24, 538-553, doi:10.1038/s41556-022-00881-4  
249 (2022).
- 250 12 Albregues, J. et al. Neutrophil extracellular traps produced during inflammation awaken  
251 dormant cancer cells in mice. *Science* (New York, N.Y.) 361, doi:10.1126/science.aao4227  
252 (2018).
- 253 13 Dai, J. et al. Astrocytic laminin-211 drives disseminated breast tumor cell dormancy in  
254 brain. *Nat. Cancer* 3, 25-42, doi:10.1038/s43018-021-00297-3 (2022).
- 255 14 Al-Mehdi, A. B. et al. Intravascular origin of metastasis from the proliferation of  
256 endothelium-attached tumor cells: A new model for metastasis. *Nat. Med.* 6, 100-102,  
257 doi:10.1038/71429 (2000).
- 258 15 Wong, C. W. et al. Intravascular location of breast cancer cells after spontaneous metastasis  
259 to the lung. *Am. J. Pathol.* 161, 749-753, doi:10.1016/s0002-9440(10)64233-2 (2002).
- 260 16 Bragado, P. et al. TGF- $\beta$ 2 dictates disseminated tumour cell fate in target organs through  
261 TGF- $\beta$ -RIII and p38 $\alpha$ / $\beta$  signalling. *Nat. Cell Biol.* 15, 1351-1361, doi:10.1038/ncb2861  
262 (2013).
- 263 17 Nobre, A. R. et al. Bone marrow NG2(+)/Nestin(+) mesenchymal stem cells drive DTC  
264 dormancy via TGF $\beta$ 2. *Nat. Cancer* 2, 327-339, doi:10.1038/s43018-021-00179-8 (2021).



- 265 18 Niehrs, C. The complex world of WNT receptor signalling. *Nat. Rev. Mol. Cell Biol.* 13,  
266 767-779, doi:10.1038/nrm3470 (2012).
- 267 19 Yu, M. et al. RNA sequencing of pancreatic circulating tumour cells implicates WNT  
268 signalling in metastasis. *Nature* 487, 510-513, doi:10.1038/nature11217 (2012).
- 269 20 Miyamoto, D. T. et al. RNA-Seq of single prostate CTCs implicates noncanonical Wnt  
270 signaling in antiandrogen resistance. *Science* (New York, N.Y.) 349, 1351-1356,  
271 doi:10.1126/science.aab0917 (2015).
- 272 21 Malladi, S. et al. Metastatic latency and immune evasion through autocrine inhibition of  
273 WNT. *Cell* 165, 45-60, doi:10.1016/j.cell.2016.02.025 (2016).
- 274 22 Tammela, T. et al. A Wnt-producing niche drives proliferative potential and progression in  
275 lung adenocarcinoma. *Nature* 545, 355-359, doi:10.1038/nature22334 (2017).
- 276 23 Singhal, M. et al. Temporal multi-omics identifies LRG1 as a vascular niche instructor of  
277 metastasis. *Sci. Trans. Med.* 13, eabe6805, doi:10.1126/scitranslmed.abe6805 (2021).
- 278 24 Hongu, T. et al. Perivascular tenascin C triggers sequential activation of macrophages and  
279 endothelial cells to generate a pro-metastatic vascular niche in the lungs. *Nat. Cancer* 3,  
280 486-504, doi:10.1038/s43018-022-00353-6 (2022).
- 281 25 Vila Ellis, L. et al. Epithelial Vegfa specifies a distinct endothelial population in the mouse  
282 lung. *Dev. Cell* 52, 617-630.e616, doi:10.1016/j.devcel.2020.01.009 (2020).
- 283 26 Gillich, A. et al. Capillary cell-type specialization in the alveolus. *Nature* 586, 785-789,  
284 doi:10.1038/s41586-020-2822-7 (2020).
- 285 27 Efremova, M., Vento-Tormo, M., Teichmann, S. A. & Vento-Tormo, R. CellPhoneDB:  
286 inferring cell-cell communication from combined expression of multi-subunit ligand-  
287 receptor complexes. *Nat. Protoc.* 15, 1484-1506, doi:10.1038/s41596-020-0292-x (2020).
- 288 28 Ombrato, L. et al. Metastatic-niche labelling reveals parenchymal cells with stem features.  
289 *Nature* 572, 603-608, doi:10.1038/s41586-019-1487-6 (2019).
- 290 29 Goveia, J. et al. An integrated gene expression landscape profiling approach to identify  
291 lung tumor endothelial cell heterogeneity and angiogenic candidates. *Cancer Cell* 37, 21-  
292 36.e13, doi:10.1016/j.ccell.2019.12.001 (2020).
- 293 30 Cheng, Y. H. et al. Hydro-Seq enables contamination-free high-throughput single-cell  
294 RNA-sequencing for circulating tumor cells. *Nat. Commun.* 10, 2163, doi:10.1038/s41467-  
295 019-10122-2 (2019).
- 296 31 Szczerba, B. M. et al. Neutrophils escort circulating tumour cells to enable cell cycle  
297 progression. *Nature* 566, 553-557, doi:10.1038/s41586-019-0915-y (2019).
- 298 32 Liberzon, A. et al. Molecular signatures database (MSigDB) 3.0. *Bioinformatics* 27, 1739-  
299 1740, doi:10.1093/bioinformatics/btr260 (2011).
- 300 33 Shaffer, S. M. et al. Rare cell variability and drug-induced reprogramming as a mode of  
301 cancer drug resistance. *Nature* 546, 431-435, doi:10.1038/nature22794 (2017).
- 302 34 Emert, B. L. et al. Variability within rare cell states enables multiple paths toward drug  
303 resistance. *Nat. Biotechnol.* 39, 865-876, doi:10.1038/s41587-021-00837-3 (2021).
- 304 35 Quinn, J. J. et al. Single-cell lineages reveal the rates, routes, and drivers of metastasis in  
305 cancer xenografts. *Science* (New York, N.Y.) 371, doi:10.1126/science.abc1944 (2021).
- 306 36 Pattabiraman, D. R. et al. Activation of PKA leads to mesenchymal-to-epithelial transition  
307 and loss of tumor-initiating ability. *Science* (New York, N.Y.) 351, aad3680, doi:10.1126/  
308 science.aad3680 (2016).

- 309 37 Zhang, Y. et al. Genome-wide CRISPR screen identifies PRC2 and KMT2D-COMPASS  
310 as regulators of distinct EMT trajectories that contribute differentially to metastasis. *Nat.*  
311 *Cell Biol.* 24, 554-564, doi:10.1038/s41556-022-00877-0 (2022).
- 312 38 Fumagalli, A. et al. Plasticity of Lgr5-negative cancer cells drives metastasis in colorectal  
313 cancer. *Cell Stem Cell* 26, 569-578.e567, doi:10.1016/j.stem.2020.02.008 (2020).
- 314 39 Gkoutela, S. et al. Circulating tumor cell clustering shapes DNA methylation to enable  
315 metastasis seeding. *Cell* 176, 98-112.e114, doi:10.1016/j.cell.2018.11.046 (2019).
- 316 40 Werner-Klein, M. et al. Interleukin-6 trans-signaling is a candidate mechanism to drive  
317 progression of human DCCs during clinical latency. *Nat. Commun.* 11, 4977,  
318 doi:10.1038/s41467-020-18701-4 (2020).
- 319 41 Ren, D. et al. Wnt5a induces and maintains prostate cancer cells dormancy in bone. *J. Exp.*  
320 *Med.* 216, 428-449, doi:10.1084/jem.20180661 (2019).
- 321 42 Montagner, M. et al. Crosstalk with lung epithelial cells regulates Sfrp2-mediated latency  
322 in breast cancer dissemination. *Nat. Cell Biol.* 22, 289-296, doi:10.1038/s41556-020-0474-  
323 3 (2020).
- 324 43 Pein, M. et al. Metastasis-initiating cells induce and exploit a fibroblast niche to fuel  
325 malignant colonization of the lungs. *Nat. Commun.* 11, 1494, doi:10.1038/s41467-020-  
326 15188-x (2020).
- 327 44 Correia, A. L. et al. Hepatic stellate cells suppress NK cell-sustained breast cancer  
328 dormancy. *Nature* 594, 566-571, doi:10.1038/s41586-021-03614-z (2021).
- 329 45 Peinado, H. et al. Pre-metastatic niches: organ-specific homes for metastases. *Nat. Rev.*  
330 *Cancer* 17, 302-317, doi:10.1038/nrc.2017.6 (2017).
- 331 46 Borriello, L. et al. Primary tumor associated macrophages activate programs of invasion  
332 and dormancy in disseminating tumor cells. *Nat. Commun.* 13, 626, doi:10.1038/s41467-  
333 022-28076-3 (2022).
- 334 47 Costa-Silva, B. et al. Pancreatic cancer exosomes initiate pre-metastatic niche formation in  
335 the liver. *Nat. Cell Biol.* 17, 816-826, doi:10.1038/ncb3169 (2015).
- 336 48 Di Martino, J. S. et al. A tumor-derived type III collagen-rich ECM niche regulates tumor  
337 cell dormancy. *Nat. Cancer* 3, 90-107, doi:10.1038/s43018-021-00291-9 (2022).
- 338 49 Liu, Y. & Cao, X. Characteristics and significance of the pre-metastatic niche. *Cancer Cell*  
339 30, 668-681, doi:10.1016/j.ccell.2016.09.011 (2016).
- 340 50 Lambrechts, D. et al. Phenotype molding of stromal cells in the lung tumor micro-  
341 environment. *Nat. Med.* 24, 1277-1289, doi:10.1038/s41591-018-0096-5 (2018).

342

343 **Acknowledgements:**

344 The authors would like to thank Dr. Kairbaan Hodivala-Dilke (Barts Cancer Institute) and Dr. Ilaria  
345 Malanchi (Francis Crick Institute), Dr. Jonathan Sleeman (University Medical Center Mannheim), and  
346 Dr. Robert Weinberg (Whitehead Institute) for providing cell lines and reagents. We thank Celine  
347 Rausch, Clara Mai and Carleen Spegg for technical assistance. We are grateful for the technical support  
348 of the Flow Cytometry Core Facility, the Single-Cell Open Lab, the Genomics and Proteomics Core  
349 Facility, the Omics IT and Data Management Core Facility, the Laboratory Animal Core Facility and  
350 the Light Microscopy Core Facility of the DKFZ. This work was supported by grants from the Deutsche  
351 Forschungsgemeinschaft (Collaborative Research Center CRC1366 'Vascular Control of Organ  
352 Function' [project number 39404578; projects C5 to H. G. Augustin and Z3 to S. Anders], Collaborative  
353 Research Center CRC1324 'Wnt signaling' [project number 331351713; project A2 to H. G. Augustin],  
354 the European Research Council Advanced Grant "AngioMature" [project 787181 to H. G. Augustin],  
355 the Deutsche Krebshilfe grant "AgedSoil" within the Excellence Program for Established Scientists  
356 [project 70114532 to H.G. Augustin] and the State of Baden-Württemberg Foundation special program  
357 "Angioformatics Single Cell Platform" [to H.G. Augustin].

358 **Data availability:**

359 All raw sequencing data, annotated and filtered count matrices generated in this study, will be made  
360 available to the reviewers upon request and publicly available upon final acceptance of the manuscript.

361 **Code availability:**

362 All code generated in this study will be made available to the reviewers upon request and publicly  
363 available upon final acceptance of the manuscript.

364 **Figure 1**

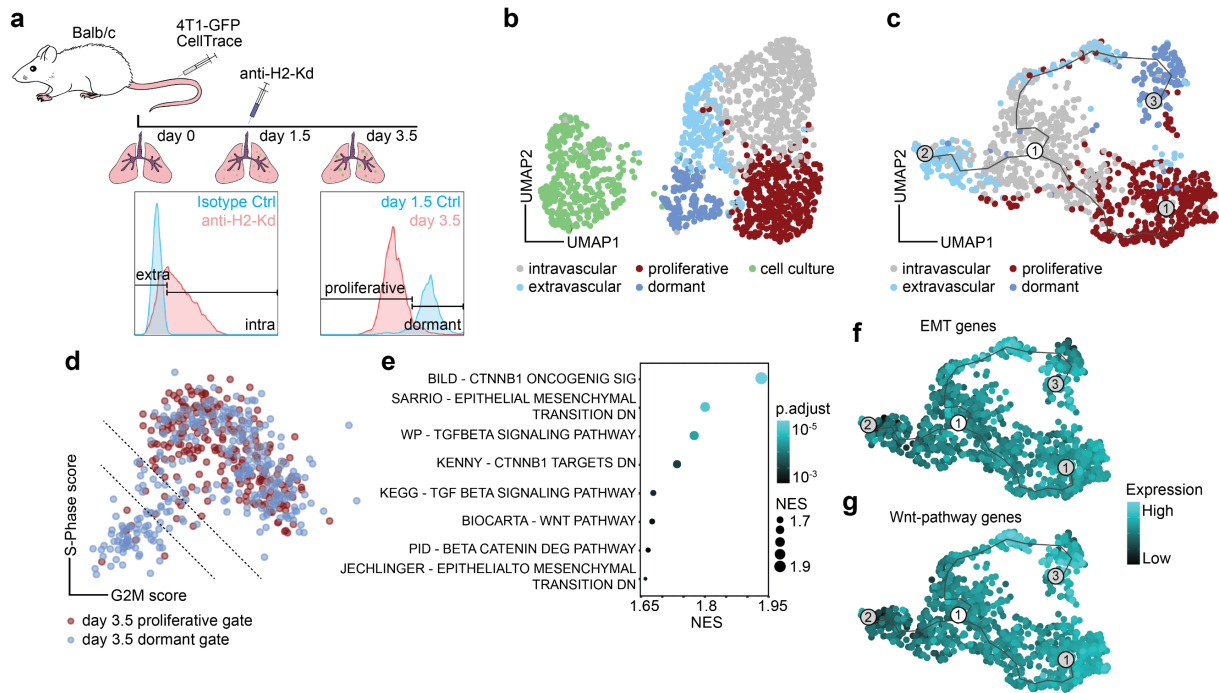

365

366 **Fig. 1: Extravasating and dormant tumour cells are defined by a Wnt and EMT signature.** **a**, Schematic  
 367 of the experimental design. Recipient Balb/c mice received two injections of  $1 \times 10^6$  4T1-GFP cells stained  
 368 with CellTracer dye into the tail vein. At day 1.5 post-injection, mice were injected intravenously with  $5 \mu\text{g}$   
 369 of fluorescently labelled anti-H2-Kd antibody. Tumour cells (TC) and endothelial cells (EC) were sampled  
 370 at day 0 (uninjected baseline), day 1.5 and day 3.5. TCs were discriminated based on extravasation status on  
 371 day 1.5 and based on proliferation status on day 3.5. **b**, Uniform manifold approximation and projection  
 372 (UMAP) of total TC dataset. Shared nearest neighbour (SNN-) based clustering resolves transcriptomes of  
 373 TCs into 5 clusters. **c**, Trajectory analysis of extracted TCs reveals three transition branches. **d**, Scatter plot  
 374 of S-Phase and G2M gene expression scores for individual cells extracted on day 3.5 and coloured by  
 375 respective FACS gates. Dotted line indicates thresholds of cells with score sums  $< -1$  (lower line) and score  
 376 sums  $< 0$  (upper line). **e**, Gene set enrichment analysis (GSEA) of genes upregulated in bona fide dormant  
 377 tumour cells ranked by fold change. NES, normalised enrichment score. **f**, Summed expression of 384 genes  
 378 upregulated during epithelial-to-mesenchyme transition (EMT) and **g**, 146 genes associated with Wnt  
 379 pathway plotted on the trajectory graph from **c**.

380 **Figure 2**

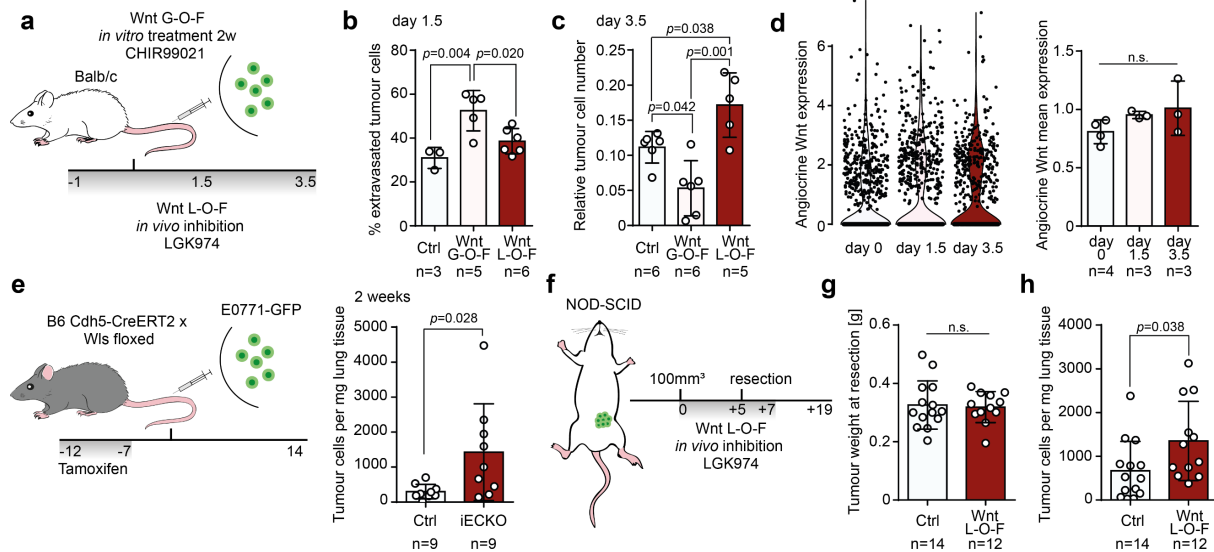

381

382 **Fig. 2: Lung endothelial cells are a major source of dormancy-inducing Wnt ligands.** a, Schematic of  
 383 the experimental gain-of-function (G-O-F) and loss-of-function (L-O-F) strategy. Grey bar indicates  
 384 timespan (in days) of daily treatment with LGK974. b, Percentage of extravasated TCs for control treatment,  
 385 G-O-F or L-O-F approach 1.5 days post-injection. Error bars s.d., *p* values by one-way ANOVA with Tukey  
 386 post-test are shown. c, Quantification of relative TC number normalised to EC abundance in lungs 3.5 days  
 387 post-injection for control treatment, G-O-F or L-O-F approach. Error bars s.d., *p* values by one-way ANOVA  
 388 with Tukey post-test are shown. d, Summed expression of Wnt ligands per timepoint in individual ECs (left  
 389 panel) or as mean expression for pseudo-bulks of biological replicates. Error bars s.d., *p* values were  
 390 calculated by one-way ANOVA with Tukey post-test. n.s., not significant. e, Schematic of experiment. Gene  
 391 recombination was induced by tamoxifen administration.  $2 \times 10^5$  E0771-GFP cells were injected into the tail  
 392 vein of EC-specific knockout (iECKO) and control animals. Grey bar indicates timespan (in days) of daily  
 393 tamoxifen treatment (left panel). Total number of TCs per milligram lung tissue of control and iECKO mice  
 394 two weeks post-injection of E0771-GFP. Error bars s.d., *p* value by two-tailed *t*-test is shown. f, Schematic  
 395 of the experiment.  $1 \times 10^6$  4T1-GFP cells were implanted into the mammary fat pad of NOD-SCID mice. Once  
 396 tumours reached a size of  $100 \text{mm}^3$ , mice were treated with LGK974 for five days until tumour-resection.  
 397 After resection, mice were treated for an additional two days and left to develop metastases. Grey bar  
 398 indicates timespan (in days) of daily treatment with LGK974. g, Weights of resected primary tumours. Error  
 399 bars s.d., *p* value was calculated by two-tailed *t*-test. n.s., not significant. h, Total number of TCs per  
 400 milligram lung tissue of control and LGK974 treated mice two weeks post-resection. Error bars s.d., *p* value  
 401 by two-tailed *t*-test is shown.

402 **Figure 3**

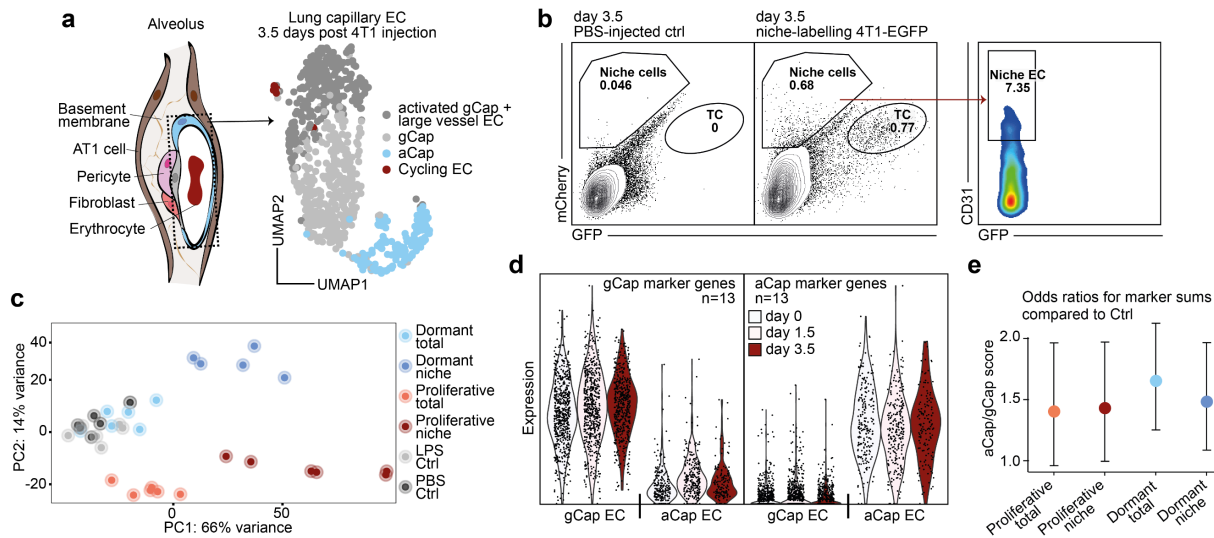

403

404 **Fig. 3. Dormant tumour cells do not occupy distinct vascular niches in the lung.** **a**, Schematic of lung  
 405 alveolus (left panel). Dotted box highlights ECs. UMAP of EC transcriptomes reflecting the composition of  
 406 bulk EC samples 3.5 days post-injection of 4T1-GFP cells. **b**, Representative FACS gates for purifying  
 407 labelled niche ECs 3.5 days post-injection of niche-labelling 4T1-GFP. **c**, Principal component analysis of  
 408 samples included in the experiment. Total samples refer to unlabelled CD31+ ECs, niche samples refer to  
 409 labelled CD31+ ECs, dormant samples refer to injections of niche-labelling D2.0R-GFP, proliferative  
 410 samples refer to injections of niche-labelling 4T1-GFP, LPS controls were injected intraperitoneally with  
 411 LPS 24 hours prior to euthanasia, PBS controls were injected intravenously with PBS 3.5 days prior to  
 412 euthanasia. **d**, Summed expression of gCap and aCap marker genes in individual ECs split by timepoints and  
 413 by EC identity. **e**, Log2 fold changes of aCap marker genes to gCap marker genes odds ratios normalised to  
 414 PBS-injected control samples. Error bars indicate 95% confidence interval.



415 **Figure 4**

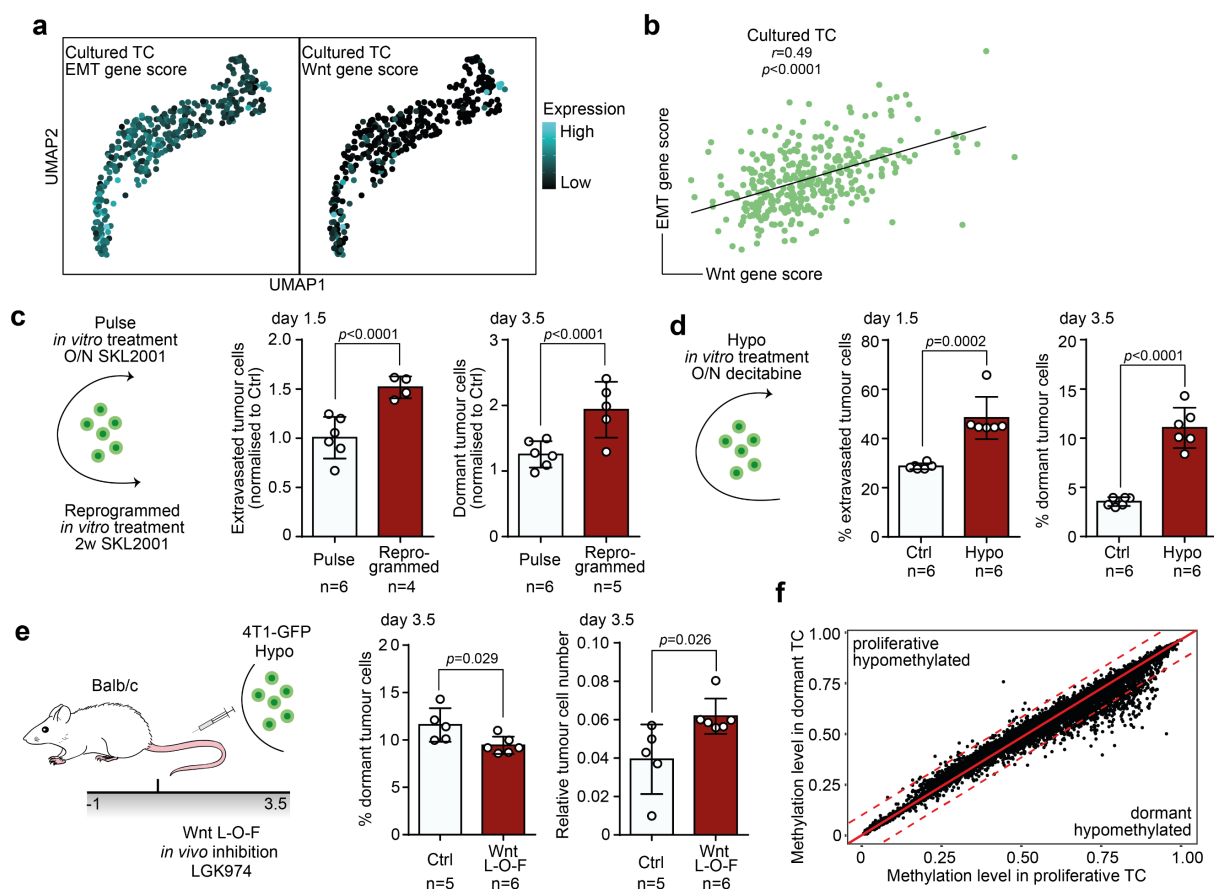

416

417 **Fig. 4. Tumour cell behaviour in the metastatic niche is pre-determined by methylation state.** **a**, Gene  
418 scores of EMT (left panel) and Wnt pathway-associated genes (right panel) in cultured TCs visualised in a  
419 UMAP and **b**, correlation of the gene scores.  $P$  value and  $r$  value by Pearson correlation are shown. **c**,  
420 Schematic of experiment (left panel). 4T1-GFP cells were either treated overnight with Wnt agonist (pulse)  
421 or for two weeks (reprogrammed) prior to injection. Relative fraction of extravasated TCs normalised to the  
422 respective control 1.5 days post-injection (mid panel) and relative fraction of dormant TCs normalised to the  
423 respective control 3.5 days post-injection (right panel). Error bars, s.d.,  $p$  values by two-way ANOVA with  
424 Sidak post-test are shown. **d**, Schematic of experiment (left panel). 4T1-GFP cells were treated overnight  
425 with de-methylating agent decitabine (hypo). Percentage of extravasated TCs for control and  
426 hypomethylation treatment 1.5 days post-injection (mid panel) and percentage of dormant TCs 3.5 days post-  
427 injection (right panel). Error bars, s.d.,  $p$  values by two-tailed t-test are shown. **e**, Schematic of experimental  
428 L-O-F approach (left panel). 4T1-GFP cells were treated overnight with decitabine. Grey bar indicates  
429 timespan (in days) of daily treatment with LGK974. Percentage of dormant TCs 3.5 days post-injection for  
430 control and LGK974 treated animals (mid panel) and relative tumour cell number normalised to EC  
431 abundance in lungs (right panel). Error bars, s.d.,  $p$  values by two-tailed t-test are shown. **f**, Scatter plot of  
432 methylation level (fraction of methylated CpG islands) for gene bodies in dormant TCs and proliferative  
433 TCs. Red line indicates no differences in methylation, dotted red lines indicate thresholds for >10%  
434 differences in methylation.

## 435 **Materials & Methods:**

### 436 **Animal studies**

437 Female NOD-SCID and BALB/c mice were acquired from Janvier Labs. B6 *Cdh5*-CreERT2 x  
438 *Wls* floxed mice were published previously<sup>51</sup> and bred in barrier animal facilities of the German  
439 Cancer Research Centre. All animal work was performed in accordance with German national  
440 guidelines on animal welfare and the regulations of the regional council Karlsruhe under permit  
441 numbers G-164/16, G-107/18, DKFZ305 and DKFZ370. Mice were housed in sterile cages,  
442 maintained in a temperature-controlled room and fed autoclaved water and food *ad libitum*. All  
443 animals were monitored daily for signs of disease and ear punches were used for genotyping  
444 the mice. Imported mice were allowed to acclimatize for a minimum of seven days before each  
445 experiment. For all experiments, 8-12 weeks old mice were used and euthanized via rapid  
446 cervical dislocation of the spinal cord at the experimental endpoint.

447 For experimental metastasis, tumour cells were resuspended in 200  $\mu$ l PBS and injected into  
448 the tail vein of mice. For transcriptomic and epigenomic screening experiments (**Fig. 1a**, **Fig.**  
449 **3a**), female Balb/c mice were injected twice with  $1 \times 10^6$  tumour cells (4T1-GFP, niche-labelling  
450 4T1-GFP, niche-labelling D2.0R-GFP) with a 30 minute break between injections. For  
451 pharmacological treatment studies, female Balb/c mice were injected once with  $1 \times 10^6$  4T1-GFP  
452 cells. For genetic knockout experiments, male and female B6 *Cdh5*-CreERT2 x *Wls* floxed  
453 mice were injected with  $2 \times 10^5$  E0771-GFP or B16F10, respectively. To stain intravascular  
454 cells, 5  $\mu$ g of fluorescently labelled anti-H2-Kd antibody in 50  $\mu$ l PBS was injected retro-  
455 orbitally into mice 2 min prior to euthanasia.

456 Pharmacological systemic depletion of WNT was achieved by daily oral gavage of 10 mg/kg  
457 body weight LGK974 resuspended in 0.5% methylcellulose (Sigma-Aldrich), 0.5% TWEEN  
458 80 (Sigma-Aldrich) in PBS as described previously<sup>52</sup>.

459 EC-specific depletion of Wnt ligands was achieved using B6 *Cdh5*-CreERT2 x *Wls* floxed  
460 mice. Genetic recombination was initiated by intraperitoneal delivery of 2 mg tamoxifen  
461 (Sigma Aldrich) dissolved in 50  $\mu$ l corn oil with 5% ethanol. Both Cre+ and Cre- littermates  
462 received 5 consecutive daily injections and were subjected to a one-week washout period before  
463 the start of the experiment.

464 To model spontaneous dissemination,  $1 \times 10^6$  4T1-GFP cells in 100  $\mu$ l PBS were injected into  
465 the inguinal mammary fat pad of female NOD-SCID mice. Tumour volumes were assessed by  
466 calliper measurements (tumour volume =  $\frac{1}{2}$  x length x width x width). Upon reaching tumour  
467 sizes of 100 mm<sup>3</sup>, mice were treated daily with LGK974 for 5 days with subsequent resection  
468 of the primary tumour. LGK974 treatment continued for 2 days post-resection and mice were  
469 left to develop metastases for 2 weeks.

470 To account for general inflammatory signatures in lung EC in the niche-labelling experiment  
471 (**Fig. 3b, c**), mice were injected with 1 mg/kg LPS (Sigma Aldrich) in 0.9% NaCl (Braun)  
472 intraperitoneally 24 h prior to euthanasia.

473 After euthanizing the mice, lungs were collected in PBS, metastatic foci were counted (B16F10  
474 experiments), lungs were imaged using a stereomicroscope (Leica) (E0771 experiments,

475 primary tumour experiments) and processed for flow cytometry. Resected primary tumours  
476 were rinsed in PBS and fixed in formalin free Zn-buffer.

#### 477 **Cell Culture**

478 4T1-GFP, D2.0R and E0771-GFP cells were a gift from the laboratories of Dr. Robert  
479 Weinberg (Whitehead Institute, Cambridge, MA), Dr. Jonathan Sleeman (Heidelberg  
480 University, Mannheim, Germany) and Dr. Kairbaan Hodivala-Dilke (Barts Cancer Institute,  
481 London, England), respectively. B16F10 cells were purchased from ATCC. All cells were  
482 maintained at 37°C and 5% CO<sub>2</sub> in high humidity and cultured in high glucose DMEM (Gibco)  
483 supplemented with 10% (vol/vol) FCS and 100 U/mL penicillin/streptomycin (Sigma Aldrich).  
484 D2.0R-GFP and 4T1-mCherry cells were generated by lentiviral transduction with TurboGFP  
485 and mCherry reporter, respectively. Niche-labelling cells were generated by lentiviral  
486 transduction of 4T1-GFP and D2.0R-GFP cells. Niche-labelling lentivirus was provided by the  
487 laboratory of Dr. Ilaria Malanchi (Francis Crick Institute, London, England). Cells were  
488 checked regularly for mycoplasma contamination by PCR and cell identity was confirmed by  
489 cell morphology. Cells were subcultured upon reaching 80-90% confluency by trypsin-EDTA  
490 (Sigma Aldrich) treatment.

491 For *in vitro* treatments, cell media were supplemented with 20 mM SKL2001 in DMSO  
492 (Selleckchem), 3 mM in DMSO CHIR99021 (Selleckchem) or 1 µM in PBS decitabine (Sigma  
493 Aldrich). Cells were treated overnight (~17 h) for pulse treatments (SKL2001, CHIR99021,  
494 decitabine) or for 2 weeks with daily media changes for reprogramming (SKL2001,  
495 CHIR99021) with drugs or vehicle (solvent only).

#### 496 **Isolation of lung cells**

497 Isolated lungs were minced on ice using curved serrated scissors. The minced tissue was  
498 resuspended in DMEM supplemented with Liberase Thermolysin Medium enzyme mix (0.2  
499 mg/ml, Roche) and DNase I (0.2mg/ml, Sigma Aldrich) and incubated at 37°C first for 15 min  
500 and then again for 12 minutes. After each incubation, minced tissues were passed through 18G  
501 cannula syringes 30 times. After the second incubation, digested tissues were passed through  
502 100 µm cell strainer to remove tissue debris and cell clumps. The following steps were  
503 performed on ice. The digestion reaction was quenched by adding FCS and samples were  
504 centrifuged at 4°C and 400 g for 4 min. Erythrocytes were lysed by resuspending the cell pellet  
505 in pre-chilled 1x ammonium chloride potassium (ACK) buffer. The reaction was quenched by  
506 adding ice-cold PBS, followed by centrifugation.

#### 507 **Flow cytometry analysis and FACS sorting**

508 Whole lung single cell suspensions were passed through a 40 µm cell strainer and preincubated  
509 with anti-mouse CD16/CD32 Fc block (1:100, Thermo Fisher Scientific) for 15 min in flow  
510 buffer (PBS supplemented with 5% (vol/vol) FCS) and, subsequently, with the appropriate  
511 antibody-mix for 20 min on ice.

512 For cell sorting and flow cytometry analysis, dead cells were excluded by staining with  
513 FxCycle™ Violet Stain (1:1000, Thermo Fisher Scientific) or Fixable Viability Dye  
514 eFluor™ 780 (1:1000, Thermo Fisher Scientific) according to the manufacturer's instructions.  
515 All samples were gated on viable cells followed by exclusion of cell doublets and CD45+,  
516 LYVE1+, PDPN+ and TER119+ cells using the BD FACS Diva Software (BD Biosciences).

517 For flow cytometry, samples were recorded on the BD LSR Fortessa or BD FACSCanto II cell  
518 analyser (both BD Biosciences) and flow data was analysed with FlowJo software (BD  
519 Biosciences, v10). Tumour cells frequencies were calculated either as percentage of sample-  
520 matched lung endothelial cells (relative tumour cell number) or as total tumour cell counts per  
521 mg lung tissue using CountBright™ Absolute Counting Beads according to the  
522 manufacturer's protocol. Cells were sorted using a BD bioscience Aria cell sorting platform  
523 (BD Biosciences) with 100 µm nozzle.

#### 524 **Single cell RNA-sequencing**

525 ScRNAseq on tumour cell subpopulations and endothelial cells was performed using a modified  
526 SMART-Seq2 protocol<sup>53</sup>. In brief, single cells were sorted directly into 96 well-plates  
527 containing 1 µl of lysis buffer per well, centrifuged and snap frozen in liquid nitrogen. For  
528 CD45- PDPN- LYVE- TER119- CD31+ EC, four plates (384 cells) were sorted for 3 biological  
529 replicates from day 1.5 and day 3.5 (total of 1152 cells per timepoint). Day 0 control samples  
530 were split and three plates (288 cells) were sorted for 2 biological replicates on day 1.5, as well  
531 as on day 3.5 (total of 1152 cells), respectively, to account for technical batch-effects. For TC,  
532 1 plate of matched intravascular and extravascular fractions (each 96 cells) was sorted from 4  
533 biological replicates (total of 384 cells per fraction) on day 1.5. Similarly, 1 plate of matched  
534 dormant and proliferative fractions was sorted from 4 biological replicates on day 3.5. Frozen  
535 plates were thawed on ice and oligo-dT-primer were annealed at 70°C for 3 min. 1.3 µl of  
536 reverse transcription mix with template-switching oligo was added to each well and isolated  
537 mRNA was transcribed to full-length cDNA. Full-length cDNA was then amplified by adding  
538 2.4 µl of PCR mastermix to each well. Due to their low RNA-content, EC cDNA was amplified  
539 using 22 cycles, while TC cDNA was amplified with 18 cycles. Amplified cDNA was purified  
540 using AMPure XP beads (Beckman Coulter) and random wells were selected for quality control  
541 using 2100 Bioanalyzer (Agilent) and Qubit fluorometer (Thermo Fisher Scientific). DNA  
542 concentration for each well was measured using Quant-iT™ high sensitivity kit (Thermo Fisher  
543 Scientific) and concentrations were manually adjusted to 0.1 - 0.3 ng/µl. Tagmentation was  
544 performed using the Nextera XT DNA library preparation kit (Illumina) and a mosquito liquid  
545 handler (SPT Labtech). For this purpose, 1.2 µl of Nextera XT – TD buffer mix was added to  
546 each well of a 384 well plate with 0.4 µl of cDNA. For EC, 96 well plates from the individual  
547 biological replicates were pooled into one 384 well plate, whereas TC replicates were pooled  
548 according to sort gates. After tagmentation, customized i5 and i7 index primers were added,  
549 resulting in unique labelling of each well in the 384 well plate and tagmented cDNA was  
550 amplified using 14 PCR cycles. All uniquely labelled wells from each plate were pooled and  
551 multiplexed libraries were purified and quality controlled using TapeStation (Agilent) and  
552 Qubit fluorometer (Thermo Fisher Scientific), resulting in one multiplex per biological replicate  
553 for EC and one multiplex per FACS-sorted TC fraction. Multiplexes were then sequenced on  
554 individual lanes on a HiSeq2000 (Illumina) using V4 50 cycle single read kit generating  
555 approximately 500,000 reads per cell.

#### 556 **Bulk RNA-sequencing of labelled niche EC**

557 For the niche-labelling experiment 50,000 unlabelled lung EC and sample-matched total  
558 labelled EC were directly sorted as described above into RNase-free 1.5 ml microcentrifuge  
559 tubes containing 100 µl lysis buffer and immediately snap frozen on dry ice. For each condition

560 6 biological replicates were included. For control samples (LPS control and PBS control)  
561 50.000 lung EC were sorted. Snap frozen RNA was extracted using Arcturus PicoPure RNA  
562 Isolation Kit (Thermo Fisher Scientific) according to manufacturer instructions. RNA was  
563 quality controlled by Qubit fluorometer (Thermo Fisher Scientific) and 2100 Bioanalyzer  
564 (Agilent). Samples with RNA integrity number (RIN)-values below 8 were discarded. RNA  
565 was transcribed to full-length cDNA using the SMART-Seq2<sup>53</sup> protocol and RNA-sequencing  
566 libraries were generated using the NEBNext<sup>®</sup> Ultra<sup>™</sup> II FS DNA library preparation kit (New  
567 England Biolabs) according the manufacturer's protocol with DNA input below 100 ng.  
568 Libraries were indexed using unique i5 and i7 combinations and equimolarly pooled into one  
569 multiplex. The multiplex was sequenced over two lanes on a NovaSeq 6000 using the S1 100  
570 cycle paired-end kit generating approximately 35x10<sup>6</sup> reads per sample.

### 571 **Whole genome bisulfite sequencing**

572 For whole genome bisulfite sequencing (WGBS) analysis of dormant and proliferative TC,  
573 lungs of 6 mice were pooled into one sample and 200.000 proliferative TC as well as total  
574 dormant TC were sorted from 4 pools. Sorted samples were centrifuged and cell pellets were  
575 snap frozen on dry ice. Genomic DNA was extracted using the NucleoSpin tissue mini kit for  
576 DNA from cells and tissue (Macherey-Nagel). DNA integrity was assessed by TapeStation  
577 (Agilent) and samples with DNA integrity number (DIN)-values below 7 were discarded.  
578 WGBS libraries were prepared using the xGen<sup>™</sup> Methyl-Seq DNA Library Prep Kit (IDT)  
579 with partially modified steps in bead clean-up/size selection. Briefly, 200ng genomic DNA was  
580 fragmented to 700 – 1000 bp using Covaris ultrasonicator (Covaris, Inc.) and quality checked  
581 using TapeStation (Agilent Technologies). Fragmented DNA samples were treated with  
582 bisulfite using the EpiTect Bisulfite Kit (Qiagen) following the instructions in the Illumina  
583 WGBS for Methylation Analysis Guide (Part # 15021861 Rev. B). After bisulfite conversion  
584 adapters were attached to 3' ends of single-stranded DNA fragments which are then extended  
585 to generate complementary uracil-free molecules as described in manufactures protocol. The  
586 double-stranded DNA fragments were subsequently cleaned up using 1.6x AMPure XP beads  
587 (Beckman Coulter) and size selected with a bead ratio of 0.6x and 0.2x, followed by ligation of  
588 truncated adapter 2 to uracil-free strand. The adapter-ligated libraries were enriched and  
589 indexed using 6 cycles of PCR and purified using magnetic beads according to the protocol.  
590 Amplified libraries were quality checked using Qubit fluorometer (Thermo Fisher Scientific)  
591 and TapeStation (Agilent). Libraries were pooled equimolarly into one multiplex and  
592 sequenced over two lanes on a NovaSeq 6000 using the S1 150 cycle paired-end kit enabling  
593 an average genomic coverage of >15.

### 594 **Niche-labelling RNA-Sequencing analysis**

595 Raw sequencing data were demultiplexed and FASTQ files were generated using bcl2fastq  
596 software (Illumina, v2.20.0.422). FASTQ files were mapped to the GRCm38 mouse reference  
597 genome using salmon (v0.7.2)<sup>54</sup> and count matrices were constructed with the R package  
598 tximport (v1.18.0)<sup>55</sup>. Differential gene expression analysis was performed using DESeq2  
599 (v.1.30.1)<sup>56</sup>. Each condition was tested against each condition and differentially expressed  
600 genes were used for gene set enrichment analysis (GSEA). GSEA<sup>57,58</sup> was performed using the  
601 R package clusterProfiler (v3.18.1)<sup>59</sup> or the GSEA java desktop application and the Molecular  
602 Signatures Database (MSigDB, v7.4)<sup>32</sup> provided by the Broad Institute.



603 For the proliferative niche EC gene panel, DEG were filtered for genes that were specifically  
604 upregulated in proliferative niche EC in at least three comparisons ( $p < 0.01$  &  $\log_2$  fold change  
605  $> 0.5$ ) and were not regulated in non-proliferative niche EC comparisons. For deconvolution of  
606 bulk samples aCap and gCap marker genes were defined using the scRNAseq dataset.  
607 Expression coefficients (aCap/gCap) of summed marker genes were calculated for each bulk  
608 sample using quasibinomial fitting and normalised to PBS injected control samples. Resulting  
609 ratios were exponentiated for plotting.

## 610 **Single-cell RNA-seq analysis**

### 611 *Pre-processing and normalisation*

612 Raw sequencing data were processed as described above. Gene expression was normalised to  
613 the mean expression of a housekeeping gene panel (*Actb*, *Gapdh*, *Tubb5*, *Ppia*, *Ywhaz*, *B2m*,  
614 *Pgk1*, *Tbo*, *Arbp*, *Gusb*, *Hprt1*) for each cell, scaled with factor 10.000 and  $\log_{10}$  normalised.  
615 Normalised count matrices were further analysed using the R package Seurat (v4.0.1)<sup>60,61</sup>. Gene  
616 counts per cell, read counts per cell and percentage of mitochondrial transcripts were computed  
617 using the respective functions of the Seurat package. For the EC dataset, cells with a percentage  
618 of mitochondrial transcripts greater than 5%, along with those with fewer than 1000 genes were  
619 excluded. For the TC dataset, only cells with a mitochondrial transcript percentage less than  
620 5% and more than 2500 genes were kept for further analysis.

### 621 *Dimension reduction and clustering*

622 Shared nearest neighbour (SNN)-based clustering and UMAP visualization were performed  
623 using the FindClusters and RunUMAP functions within the Seurat package. Each of these were  
624 performed on the basis of a principal component analysis, which was performed using the  
625 RunPCA function of the Seurat package. For the EC dataset dimensional reduction was  
626 performed on 10 principal components (PC) with the resolution parameter set to 0.2 for  
627 clustering, whereas for the TC dataset 15 PCs and 0.5 resolution were used. Clusters were  
628 annotated using congruent marker expression or according to enrichment for cells derived from  
629 a specific FACS gate. Contaminating cells were removed from the dataset based on expression  
630 of immune marker genes (*Ptprc*, *Itgam*, *Itgax*, *Adgre1*, *Cd3e*, *Cd19*, *Cd56*) or stromal cell and  
631 vessel mural cell marker genes (*Pdgfrb*, *Des*, *Myh11*, *Colla2*, *Pdgfra*, *Cspg4*, *Pdpm*, *Acta2*)

### 632 *Cell cycle scoring and differential gene expression*

633 The cell-cycle state was assessed using the gene set and scoring system described previously<sup>62</sup>.  
634 Briefly, the S and G<sub>2</sub>M scores were calculated based on a list of 43 S phase-specific and 54  
635 G<sub>2</sub> or M phase-specific genes. Cells that originated from the dormant FACS gate and had  
636 summed scores of less than -1 were tested against cells from the proliferative gate that had score  
637 sums greater than 0. Differentially expressed genes were calculated by Wilcoxon rank sum test  
638 using FindMarkers-function in Seurat and used for GSEA as described above.

639 EMT and Wnt gene sets were compiled from MSigDB and gene scores for each cell were  
640 calculated using the AddModuleScore-function in Seurat.

### 641 *Trajectory analysis*

642 Trajectory analysis of lung resident TC was performed using the R package Monocle (v.3  
643 alpha)<sup>63,64</sup>. The filtered and normalised TC count matrix was subset from the TC Seurat object.  
644 Clustering and dimension reduction was performed using default parameters in Monocle3. The



645 trajectory graph was built by setting cells from the intravascular sorting-gate as starting point.  
646 Cells were coloured according to cluster identities as identified in Seurat. Gene expression of  
647 EMT and Wnt gene sets was visualised using the `plot_cells` function.

#### 648 *Analysis of TC-EC interactions*

649 Leveraging the biological replicates, TC pseudo-bulks were formed, for which all counts from  
650 cells of a specific FACS gate and biological replicate were summed and differentially expressed  
651 genes (DEG) were computed for the experimental timepoints using DESeq2<sup>56</sup>. DEG were  
652 filtered against CellPhoneDB<sup>27</sup> database to retrieve putative ligands and receptors.  
653 CellPhoneDB ligands and receptors were further filtered for expression of interaction partners  
654 in the day 1.5 EC dataset (for intravascular versus extravascular comparison) or for expression  
655 in the day 3.5 EC dataset (for dormant versus proliferative comparison), respectively. Log2 fold  
656 changes of TC-expressed ligands or receptors were plotted against each. Receptors or ligands  
657 with upregulation in extravasated and dormant TC were considered trajectory defining, as well  
658 as receptors or ligands upregulated in intravascular and proliferative TC.

#### 659 *Analysis of publicly available human CTC datasets*

660 Normalised and filtered count matrices were downloaded from provided source data<sup>30</sup> or the  
661 gene expression omnibus (GEO) under the accession code GSE109761<sup>31</sup>. Dimension reduction  
662 and visualization were performed in Seurat as described above using default parameters. Gene  
663 scores of human orthologues of the EMT and Wnt gene lists were computed as described above.

#### 664 **WGBS data analysis**

665 Raw sequencing data were demultiplexed and FASTQ files were generated using `bcl2fastq`  
666 software (Illumina, v2.20.0.422). FASTQ files were trimmed using `Trimalore` (v0.6.6)<sup>65</sup> and  
667 mapped to the GRCm39 mouse reference genome using `Bismark` (v0.22.3)<sup>66</sup>. Forward and  
668 reverse strands were collapsed and methylation sites were called in `Bismark`. Differentially  
669 methylated regions were determined with the R package `bsseq` using default parameters  
670 (v1.26.0)<sup>67</sup>. For this, biological replicates were summed and methylation fractions for annotated  
671 genomic regions between the two conditions were compared. Regulatory elements, promoters  
672 and gene bodies were annotated with annotation sheets downloaded from Ensembl database  
673 (release 105)<sup>68</sup>.

#### 674 **Real time quantitative PCR**

675 Total RNA of cell cultured tumour cells was isolated using the GenElute Mammalian Total  
676 RNA Purification Kit (Merck) according to the manufacturer's instructions. 1000 ng of RNA  
677 was reverse transcribed using the QuantiTect Reverse Transcription Kit (Qiagen) according to  
678 the manufacturer's protocol. Gene expression analysis was performed by quantitative PCR  
679 using TaqMan reactions (Thermo Fisher Scientific) and Lightcycler 480 (Roche). Gene  
680 expression levels were assessed using the  $C_t$ -method and normalised to the expression of *Actb*,  
681 resulting in  $\Delta C_t$ -values. Relative gene expression was assessed by normalizing  $\Delta C_t$ -values of  
682 individual samples to the average control  $\Delta C_t$ -value, resulting in  $\Delta\Delta C_t$ -values. Relative fold  
683 changes to control were then calculated as  $2^{-\Delta\Delta C_t}$ .

## 684 **Histology**

685 Zinc-fixed primary tumours were paraffin embedded and cut into 7 µm sections. Sections were  
686 deparaffinized and rehydrated and antigen retrieval was performed by incubation with  
687 Proteinase K (20 µg/ml, Gerbu Biotechnik) for 5 min at 37°C. Tissues were blocked in 10%  
688 ready-to-use goat serum (Zymed) for 1 hour at room temperature, followed by overnight  
689 incubation with rat anti-CD31 (1:100, BD Bioscience) and rabbit anti-Desmin (1:100, Abcam)  
690 diluted in blocking buffer at 4 °C. After three washes in TBS-T, slides were stained with anti-  
691 rat Alexa647 and anti-rabbit Alexa546 antibody at room temperature for 1 hr. Cell nuclei were  
692 counterstained with 1:2000 Hoechst 33342 (Sigma-Aldrich) and sections were mounted with  
693 DAKO mounting medium (Agilent). Images were acquired as whole-area tile scans using an  
694 Axio Scan.Z1 slide scanner (Zeiss). Image analysis was performed using Fiji software (ImageJ,  
695 1.53q). After region-of-interest (ROI) selection, CD31, Desmin and DAPI channels were  
696 binarized using thresholding. For vessel area, percentage of CD31+ area within the ROI was  
697 calculated. For vessel coverage, CD31 channel was masked and Desmin overlap with CD31  
698 was calculated. CD31+/Desmin+ double-positive vessel were considered covered and coverage  
699 was calculated as the ratio of covered/uncovered vessels.

## 700 **Statistical Analysis**

701 Statistical analysis was performed using GraphPad Prism (v6) and R (v4.0.5).

## 702 **Method specific references:**

- 703 51 Korn, C. et al. Endothelial cell-derived non-canonical Wnt ligands control vascular pruning in  
704 angiogenesis. *Development* (Cambridge, England) 141, 1757-1766, doi:10.1242/dev.104422  
705 (2014).
- 706 52 Liu, J. et al. Targeting Wnt-driven cancer through the inhibition of Porcupine by LGK974. *Proc.*  
707 *Natl. Acad. Sci. USA* 110, 20224-20229, doi:10.1073/pnas.1314239110 (2013).
- 708 53 Picelli, S. et al. Full-length RNA-seq from single cells using Smart-seq2. *Nat. Protoc.* 9, 171-181,  
709 doi:10.1038/nprot.2014.006 (2014).
- 710 54 Patro, R., Duggal, G., Love, M. I., Irizarry, R. A. & Kingsford, C. Salmon provides fast and bias-  
711 aware quantification of transcript expression. *Nat. Methods* 14, 417-419, doi:10.1038/nmeth.4197  
712 (2017).
- 713 55 Sonesson, C., Love, M. I. & Robinson, M. D. Differential analyses for RNA-seq: transcript-level  
714 estimates improve gene-level inferences. *F1000research* 4, 1521, doi:10.12688/f1000research.  
715 7563.2 (2015).
- 716 56 Love, M. I., Huber, W. & Anders, S. Moderated estimation of fold change and dispersion for RNA-  
717 seq data with DESeq2. *Genome Biol.* 15, 550, doi:10.1186/s13059-014-0550-8 (2014).
- 718 57 Mootha, V. K. et al. PGC-1alpha-responsive genes involved in oxidative phosphorylation are  
719 coordinately downregulated in human diabetes. *Nat. Genet.* 34, 267-273, doi:10.1038/ng1180  
720 (2003).
- 721 58 Subramanian, A. et al. Gene set enrichment analysis: a knowledge-based approach for interpreting  
722 genome-wide expression profiles. *Proc. Natl. Acad. Sci. USA* 102, 15545-15550, doi:doi:10.1073/  
723 pnas.0506580102 (2005).
- 724 59 Yu, G., Wang, L. G., Han, Y. & He, Q. Y. clusterProfiler: an R package for comparing biological  
725 themes among gene clusters. *OMICS* 16, 284-287, doi:10.1089/omi.2011.0118 (2012).
- 726 60 Stuart, T. et al. Comprehensive integration of single-cell Data. *Cell* 177, 1888-1902.e1821,  
727 doi:<https://doi.org/10.1016/j.cell.2019.05.031> (2019).

- 728 61 Hao, Y. et al. Integrated analysis of multimodal single-cell data. *Cell* 184, 3573-3587.e3529,  
729 doi:10.1016/j.cell.2021.04.048 (2021)
- 730 62 Tirosh, I. et al. Dissecting the multicellular ecosystem of metastatic melanoma by single-cell RNA-  
731 seq. *Science* (New York, N.Y.) 352, 189-196, doi:doi:10.1126/science.aad0501 (2016).
- 732 63 Trapnell, C. et al. The dynamics and regulators of cell fate decisions are revealed by pseudo-  
733 temporal ordering of single cells. *Nat. Biotech.* 32, 381-386, doi:10.1038/nbt.2859 (2014).
- 734 64 Qiu, X. et al. Reversed graph embedding resolves complex single-cell trajectories. *Nat. Methods*  
735 14, 979-982, doi:10.1038/nmeth.4402 (2017).
- 736 65 Krueger F, Trimgalore (2021), *GitHub repository*, <https://github.com/FelixKrueger/TrimGalore>,  
737 doi: 10.5281/zenodo.5127899
- 738 66 Krueger, F. & Andrews, S. R. Bismark: a flexible aligner and methylation caller for Bisulfite-Seq  
739 applications. *Bioinformatics* 27, 1571-1572, doi:10.1093/bioinformatics/btr167 (2011).
- 740 67 Hansen, K. D., Langmead, B. & Irizarry, R. A. BSmooth: from whole genome bisulfite sequencing  
741 reads to differentially methylated regions. *Genome Biol.* 13, R83, doi:10.1186/gb-2012-13-10-r83  
742 (2012).
- 743 68 Cunningham, F. et al. Ensembl 2022. *Nucleic Acids Res.* 50, D988-D995, doi:10.1093/nar/  
744 gkab1049 (2021).
